# Supplementary material for: Oxidative cleavage of β-O-4 bonds in lignin model compounds with a single-atom Co catalyst
Source: Royal Society of Chemistry journal article supplement (doi:10.1039/c9gc00293f), 2019-01-01
Supplement: c9gc00293f1.pdf [file c9gc00293f1.pdf]

## Supporting Information

# Oxidative Cleavage of $\beta$ -O-4 Bonds in Lignin Model Compounds with a Single-atom Co Catalyst

Sijie Liu,<sup>a,b</sup> Lichen Bai,<sup>c</sup> Antoine P. van Muyden,<sup>a</sup> Zhangjun Huang,<sup>a</sup> Xinjiang Cui,<sup>a</sup> Zhaofu Fei,<sup>a</sup> Xuehui Li,<sup>\*b</sup> Xile Hu<sup>\*c</sup> and Paul J. Dyson<sup>\*a</sup>

<sup>a</sup> *Institute of Chemical Sciences and Engineering (ISIC), École Polytechnique Fédérale de Lausanne (EPFL), 1015 Lausanne, Switzerland.*

<sup>b</sup> *School of Chemistry and Chemical Engineering, State Key Laboratory of Pulp and Paper Engineering, South China University of Technology, Guangzhou, Guangdong, 510640, China.*

<sup>c</sup> *Laboratory of Inorganic Synthesis and Catalysis, Institute of Chemical Sciences and Engineering, Ecole Polytechnique Fédérale de Lausanne (EPFL), EPFL-ISIC-LSCI, Lausanne, CH 1015 Switzerland.*

## Table of contents

- 1. Synthesis of the model compounds**
- 2. Preparation of Co nanoparticles**
- 3. Characterization of catalysts**

Table S1 Cobalt contents of the fresh as-synthesized Co-N-C catalyst.

Figure S1 Representative SEM images of Co-N-C catalyst.

Figure S2 XRD pattern of Mn-N-C, Ni-N-C and Cu-N-C catalyst.

Figure S3 Representative TEM images of Mn-N-C.

Figure S4 Representative TEM images of Ni-N-C.

Figure S5 Representative TEM images of Cu-N-C.

Figure S6 Representative TEM images of Co-N-C with nanoparticles.

- 4. Effect of reaction time and the control experiments**

Figure S7 Effect of reaction time on MPP-ol conversion and yield.

Table S2 Conversion of benzoic acid (BA) to methyl benzoate (BM) under different conditions.

Table S3 Control experiments.

Table S4 Catalytic system for the oxidation of 2-(2-methoxyphenoxy)-1-phenylethanol.

Table S5 Conversion of DMPD and GGE.

- 5. The recycle experiment and the characterization of the recycled catalyst**

Figure S8 Representative TEM images of recycled Co-N-C.

Figure S9 XPS spectra of the recycled Co-N-C catalyst.

Table S6 XPS surface content of fresh and the recycled Co-N-C catalyst.

## 6. Characterization of $\beta$ -O-4 lignin model compounds

Figure S10  $^1\text{H}$  NMR spectrum of 2-(2-methoxyphenoxy)-1-phenylethanol.

Figure S11  $^1\text{H}$  NMR spectrum of 2-(2-methoxyphenoxy)-1-phenylethanone.

Figure S12  $^1\text{H}$  NMR spectrum of 2-phenoxy-1-phenylethanol.

Figure S13  $^1\text{H}$  NMR spectrum of 2-(2,6-dimethoxyphenoxy)-1-phenylethanol.

Figure S14  $^1\text{H}$  NMR spectrum of 1-(benzyloxy)-2-methoxybenzene.

Figure S15  $^1\text{H}$  NMR spectrum of 1-(3,4-dimethoxyphenyl)-2-(2-methoxyphenoxy)-propane-1,2-diol.

Figure S16  $^1\text{H}$  NMR spectrum of guaiacylglycerol-guaiacyl ether.

## 7. References

## 1. Synthesis of the model compounds

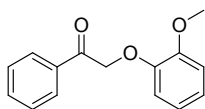

2-(2-methoxyphenoxy)-1-phenylethanone (MPP-one) was obtained by the reaction of 2-bromoacetophenone (7.36 g) and guaiacol (5.74 g) in acetone (150 ml) solution which contains  $\text{K}_2\text{CO}_3$  (9.2 g). After reflux at  $60^\circ\text{C}$  overnight,  $\text{K}_2\text{CO}_3$  was removed by filtration and the solvent was removed under reduced pressure. MPP-one was obtained after the remained solid was washed by ether for few times to remove the unreacted reactants.

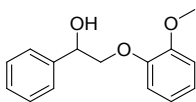

2-(2-methoxyphenoxy)-1-phenylethanol (MPP-ol) was synthesized from the reduction of MPP-one. Firstly, MPP-one (3.5 g) was dissolved in THF (60 ml),  $\text{NaBH}_4$  (1.09 g) was dissolved in water (10 ml). Then, the  $\text{NaBH}_4$  solution was added in the THF dropwise under stirring at room temperature. After stirring for 3 h,  $\text{HCl}$  (3 ml, 2 M) was added in the reaction system.  $\text{H}_2\text{O}$  (32 ml) was used to accelerate the phase separation and the aqueous phase was extracted by ether ( $3 \times 10$  ml) and combined the organic phase. Then, saturated  $\text{NaHCO}_3$  solution was used to neutralize the  $\text{HCl}$ , and anhydrous  $\text{Na}_2\text{SO}_4$  was used to remove the residual water in the organic phase. Finally, the 2-(2-methoxyphenoxy)-1-phenylethanol was obtained after and the solvents were removed under reduced pressure.

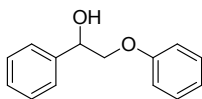

2-phenoxy-1-phenylethanol (PP-ol) was obtained from the reduction of 2-phenoxy-1-phenylethanone (PP-one) in a similar method as described above. Firstly, PP-one was synthesized by the reaction of 2-bromoacetophenone (7.36 g) and phenol (3.6 g) in acetone (150 ml) solution which contains  $\text{K}_2\text{CO}_3$  (5.47 g). After reflux at  $60^\circ\text{C}$  overnight,  $\text{K}_2\text{CO}_3$  was separated by filtration and the solvent was removed under reduced pressure. After that, the solid was dissolved in ethyl acetate and washed with water ( $3 \times 10$  ml). Anhydrous  $\text{Na}_2\text{SO}_4$  was used to remove the residual water in the organic phase. The crude product of PP-one was recrystallized from ethanol. As described above, PP-ol was obtained from the reduction of PP-one with a similar method to obtain MPP-ol from MPP-one.

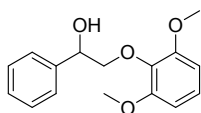

2-(2,6-dimethoxyphenoxy)-1-phenylethanol (DMP-ol) was synthesized from the reaction of 2-bromoacetophenone (7.36 g) and 2,6-dimethoxyphenol (7.13 g) in acetone (150 ml) solution which contains  $K_2CO_3$  (9.2 g). After reflux at  $60^\circ C$  overnight,  $K_2CO_3$  was separated by filtration and then rotary evaporation was used to remove the solvent. 2-(2,6-dimethoxyphenoxy)-1-phenylethanone (DMP-one) was obtained from recrystallization in ethanol. Then, DMP-one was reduced in a mixture solution of THF and water (4:1) which contains  $NaBH_4$ , and crude DMP-ol can be obtained using a similar purification method as above. The pure DMP-ol was obtained by flash column chromatography (pentane : ethyl acetate, 3:2).

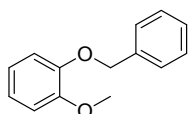

1-(benzyloxy)-2-methoxybenzene (BMB) was synthesized according to the following method: benzyl bromide (5.7 g), guaiacol (4.1 g),  $K_2CO_3$  (8.3 g) and KI (0.83 g) were combined together in acetone (45 mL) and refluxed at  $60^\circ C$  under stirring overnight. The mixture was filtered and the solvent was removed under reduced pressure. Then, deionized water (50 mL) was added in the solid and the reaction mixture was extracted with ethyl acetate ( $3 \times 10$  mL). The organic phase was washed with a saturated  $NaHCO_3$  solution, dried over  $MgSO_4$  and filtered. The solution was concentrated under reduced pressure and BMB was crystallized from a cold ethanol solution.

## 2. Preparation of Co nanoparticles

Co nanoparticles were prepared from a metal organic framework (MOF) precursor according to literature methods.<sup>1</sup> In brief,  $Co(NO_3)_2 \cdot 6H_2O$  (549 mg, 3 mmol) in MeOH (15 ml) was slowly added to 2-methylimidazole (MeIM) (615 mg, 7.5 mmol) in MeOH (15 ml) and the resulting mixture was ultrasonicated for 10 min. at room temperature. The mixture was transferred into a stainless-steel autoclave (50 ml) and heated at  $120^\circ C$  for 4 h. After the reaction, the precipitates were obtained by centrifugation and the solid was washed by ethanol ( $3 \times 15$  ml) and by dried in vacuum at  $60^\circ C$  overnight. The resulting solid material was ground into a powder using a ceramic mortar and pyrolysed at  $800^\circ C$  under  $N_2$  atmosphere for 3 h with a heating rate of  $5^\circ C/min$ . The resulting Co nanoparticles were used directly.

### 3. Characterization of the catalysts

Table S1 Cobalt content of the Co-N-C catalyst.

| Entry | Cobalt content (ppm) | Cobalt content (wt%) |
|-------|----------------------|----------------------|
| 1     | 7.88                 | 3.15                 |
| 2     | 7.79                 | 3.11                 |
| 3     | 8.38                 | 3.35                 |

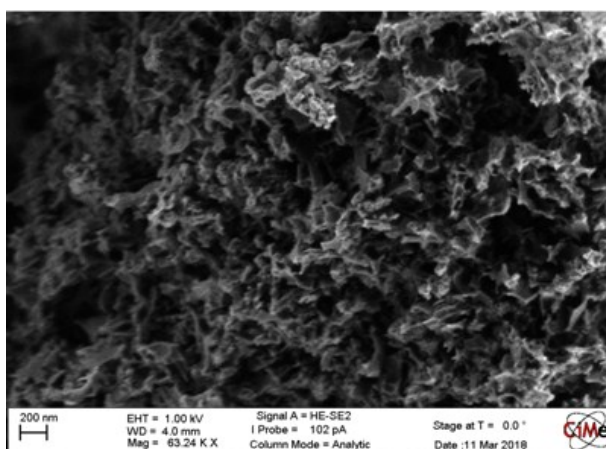

Figure S1 Representative SEM image of Co-N-C catalyst.

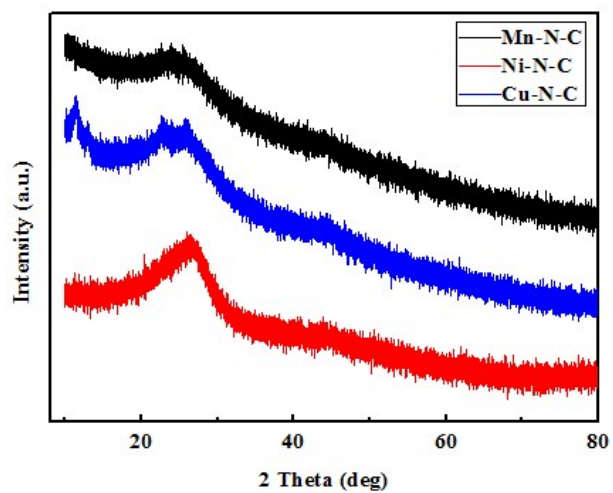

Figure S2 XRD patterns of the Mn-N-C, Ni-N-C and Cu-N-C catalysts.

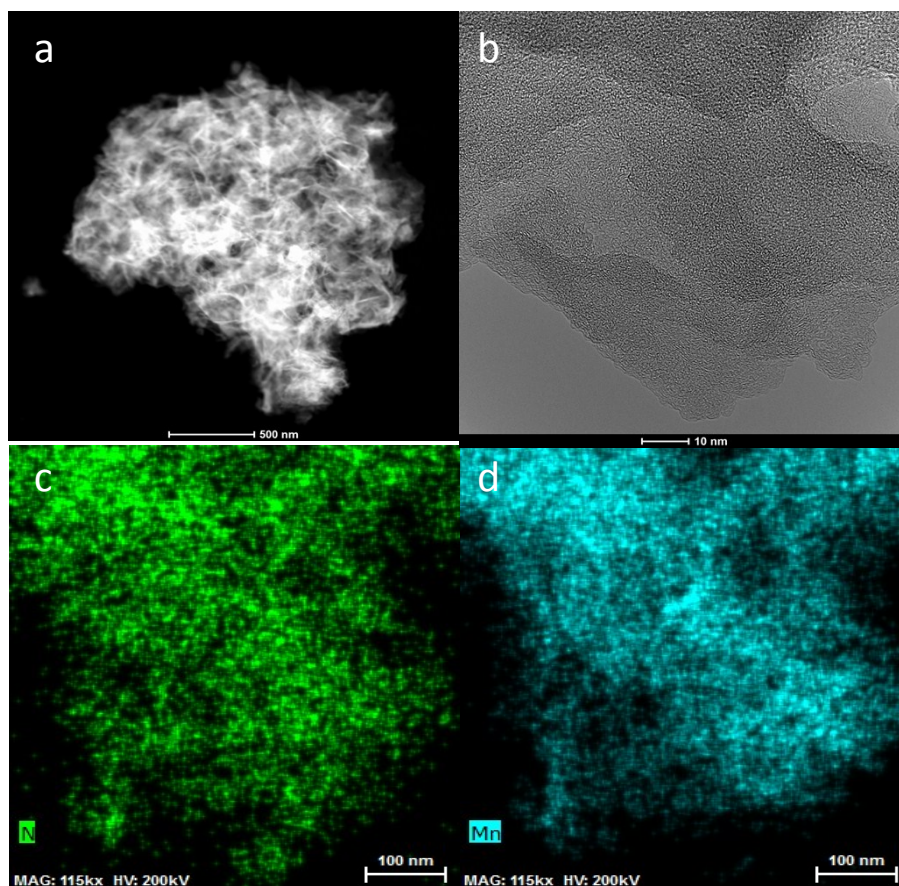

Figure S3 Representative TEM dark field image (a) and bright field image (b) of the Mn-N-C catalyst, and corresponding EDX mapping image of N (c) and Mn (d) of the Mn-N-C catalyst.

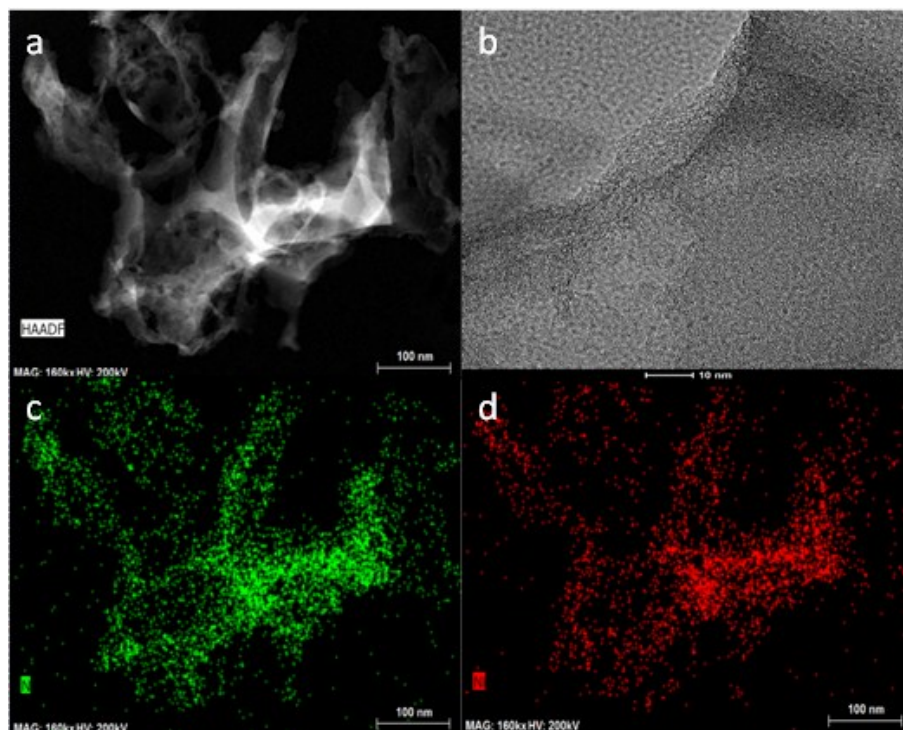

Figure S4 Representative TEM dark filed image (a) and bright filed image (b) of the Ni-N-C catalyst, and corresponding EDX mapping image of N (c) and Ni (d) of the Ni-N-C catalyst.

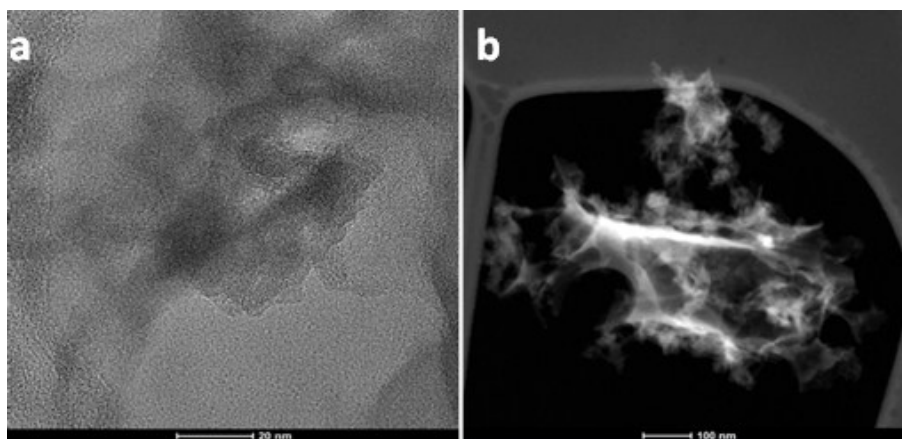

Figure S5 Representative TEM bright filed (a) and dark filed (b) image of the Cu-N-C.

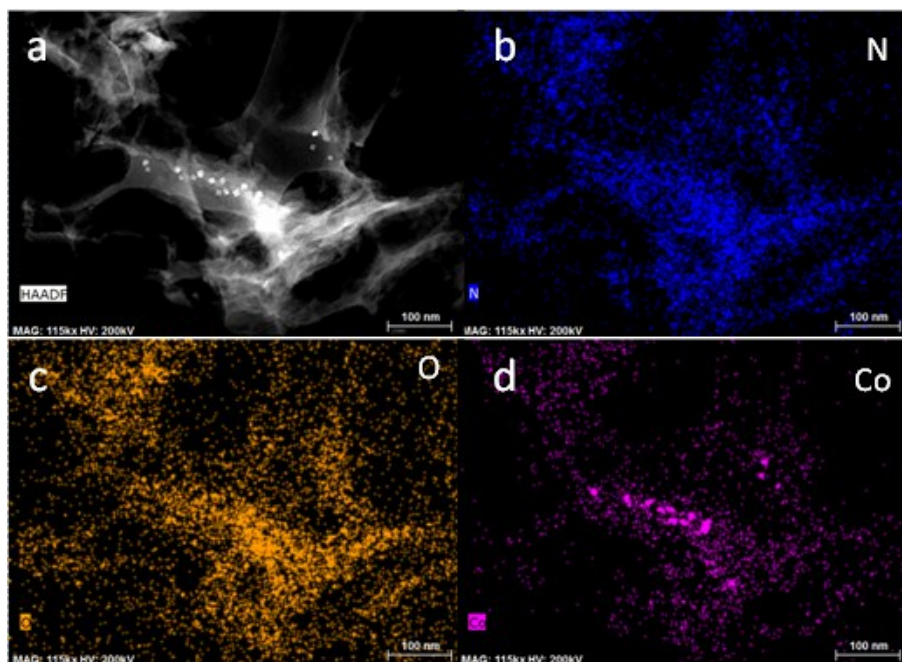

Figure S6 Representative TEM dark filed image (a) of the Co-N-C catalyst with nanoparticles and corresponding EDX mapping image of N (b), O (c) and Co (d) of the Co-N-C catalyst with nanoparticles.



#### 4. Effect of reaction time and the control experiments

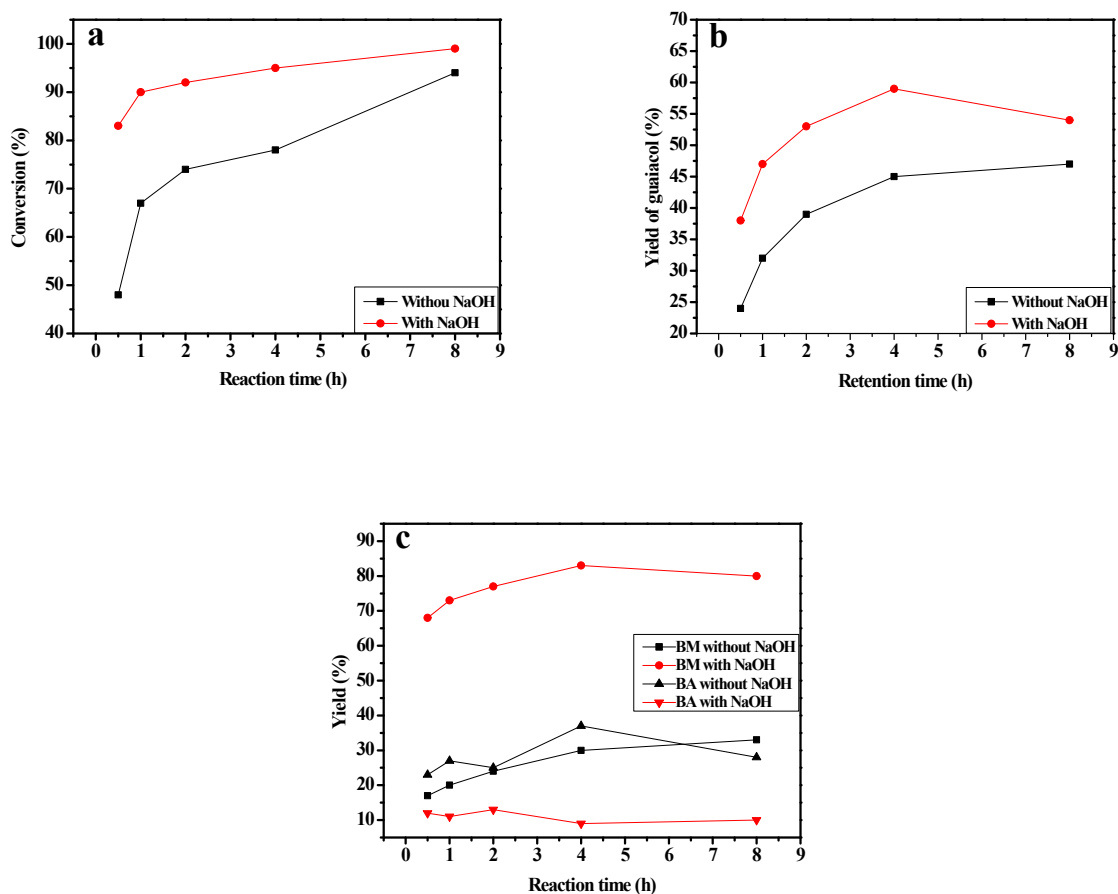

Figure S7 Effect of reaction time on (a) 2-(2-methoxyphenoxy)-1-phenylethanol (MPP-ol) conversion, (b) guaiacol (G) yield, (c) methyl benzoate (MB) yield and benzoic acid (BA) yield. Reaction conditions: Co-N-C (20 mg), MPP-ol (0.2 mmol), methanol (5 ml), air (1 MPa), 150°C.

Table S2 Conversion of benzoic acid (BA) to methyl benzoate (BM) under different conditions. <sup>a</sup>

| Entry | Catalyst |          | Solvent | Conv. (%) | Yield (%) <sup>b</sup> |
|-------|----------|----------|---------|-----------|------------------------|
|       | Co-N-C   | NaOH     |         |           |                        |
| 1     | /        | /        | MeOH    | 32        | 18                     |
| 2     | 20 mg    | /        | MeOH    | 37        | 21                     |
| 3     | /        | /        | MeCN    | <5        | /                      |
| 4     | 20 mg    | /        | MeCN    | <5        | /                      |
| 5     | /        | 0.2 mmol | MeOH    | 46        | 24                     |
| 6     | 20 mg    | 0.2 mmol | MeOH    | 78        | 63                     |

<sup>a</sup> Reaction conditions, benzoic acid (0.2 mmol), solvent (5 ml), air (1 MPa), 150°C, 4 h.

<sup>b</sup> Yields were determined by GC-FID.

Table S3 Control experiments. <sup>a</sup>

| Entry          | Substance                                                                          | Conv. (%) | Yield (%) |      |    |
|----------------|------------------------------------------------------------------------------------|-----------|-----------|------|----|
|                |                                                                                    |           | G         | BM   | BA |
| 1 <sup>b</sup> | 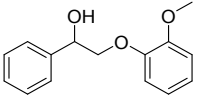  | 71        | 53        | 38   | 14 |
| 2 <sup>c</sup> |   | 81        | 46        | 51   | 9  |
| 3 <sup>d</sup> |   | 84        | 52        | 53   | 12 |
| 4              |   | 0         |           | n.d. |    |
| 5 <sup>e</sup> |   | 0         |           | n.d. |    |
| 6              |  | 96        |           | 93   |    |

n.d. = not detected.

<sup>a</sup> Reaction conditions: catalyst (20 mg), NaOH (0.2 mmol), substrate (0.2 mmol), methanol (5 ml), air (1 MPa), 150°C, 4 h.<sup>b</sup> The Co-N-C catalyst used in this run was unsuccessfully synthesized and contains nanoparticles.<sup>c</sup> NaOH was replaced by MgO (0.2 mmol).<sup>d</sup> NaOH was replaced by CaO (0.2 mmol).<sup>e</sup> Without NaOH.

Table S4 Catalytic systems for the oxidation of 2-(2-methoxyphenoxy)-1-phenylethanol ((MPP-ol).

| Entry          | Solvent                    | Catalyst                                  | Oxidant                  | Condition     |             | Conv.<br>(%) | Yield (%)                                                                                   |                                                                                             | Ref.         |
|----------------|----------------------------|-------------------------------------------|--------------------------|---------------|-------------|--------------|---------------------------------------------------------------------------------------------|---------------------------------------------------------------------------------------------|--------------|
|                |                            |                                           |                          | Temp.<br>(°C) | Time<br>(h) |              |                                                                                             |                                                                                             |              |
| 1              | Toluene                    | $\text{RuHCl}(\text{CO})(\text{PPh}_3)_3$ | /                        | 125           | 48          | 93           | 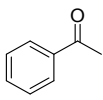<br>80   | <br>75   | [2]          |
| 2 <sup>a</sup> | [Bmim]<br>NTf <sub>2</sub> | CH <sub>3</sub> ReO <sub>3</sub>          | /                        | 180           | 14          | 98           | <br>64   | <br>69   | [3]          |
| 3              | MeOH/<br>H <sub>2</sub> O  | Co-deuteroporphyrin                       | oxone                    | RT            | 8           | 100          | <br>85   | /                                                                                           | [4]          |
| 4              | MeOH                       | Pd/CeO <sub>2</sub>                       | 1 bar O <sub>2</sub>     | 185           | 24          | 90           | <br>25   | <br>68   | [5]          |
| 5              | MeCN/<br>MeOH              | VOSO <sub>4</sub><br>Cu                   | 4 bar O <sub>2</sub>     | 100           | 12          | 93           | <br>93 | <br>26 | [6]          |
| 6 <sup>b</sup> | H <sub>2</sub> O           | [OMIm]<br>[OAc]                           | 15 bar<br>O <sub>2</sub> | 110           | 2           | 99           | <br>80 | <br>94 | [7]          |
| 7              | MeOH                       | Co-N-C                                    | 10 bar<br>Air            | 150           | 4           | 95           | <br>83 | <br>59 | This<br>work |

<sup>a</sup> Microwave heating. [Bmim]NTf<sub>2</sub> = 1-butyl-3-methylimidazolium bis(trifluoromethanesulfonyl)imide.<sup>b</sup> [OMIm][OAc] = 1-octyl-3-methylimidazolium acetate.

Table S5 Conversion of 1-(3,4-dimethoxyphenyl)-2-(2-methoxyphenoxy)-propane-1,2-diol (DMPD) and guaiacylglycerol-guaiacyl ether (GGE).<sup>a</sup>

| DMPD:     |           | GGE:          |             |                   |                        |                                 |          |
|-----------|-----------|---------------|-------------|-------------------|------------------------|---------------------------------|----------|
|           |           |               |             |                   |                        |                                 |          |
| Condition |           |               |             |                   |                        |                                 |          |
| Entry     | Substance | Temp.<br>(°C) | Time<br>(h) | Pressure<br>(MPa) | Conv. (%) <sup>b</sup> | Products (% Yield) <sup>c</sup> |          |
| 1         | DMPD      | 150           | 5~10        | Air<br>1MPa       | <5%                    | <br>n.d.                        | <br>n.d. |
| 2         | DMPD      | 180           | 10          | Air<br>1MPa       | 43                     | <br>22                          | <br>29   |
| 3         | DMPD      | 200           | 10          | Air<br>1.5MPa     | 61                     | <br>38                          | <br>47   |
| 4         | GGE       | 150           | 5~10        | Air<br>1MPa       | <5%                    | <br>n.d.                        | <br>n.d. |
| 5         | GGE       | 180           | 10          | Air<br>1MPa       | 24                     | <br>19                          | <br>1    |
| 6         | GGE       | 200           | 10          | Air<br>1.5MPa     | 42                     | <br>26                          | <br>9    |

n.d. = not detected.

<sup>a</sup> Reaction conditions: catalyst (20 mg), NaOH (0.2 mmol), substrate (0.2 mmol), methanol (5 ml).

<sup>b</sup> Conversion was determined by HPLC.

<sup>c</sup> Yields were obtained by GC-FID.

## 5. The recycle experiment and the characterization of the recycled catalyst

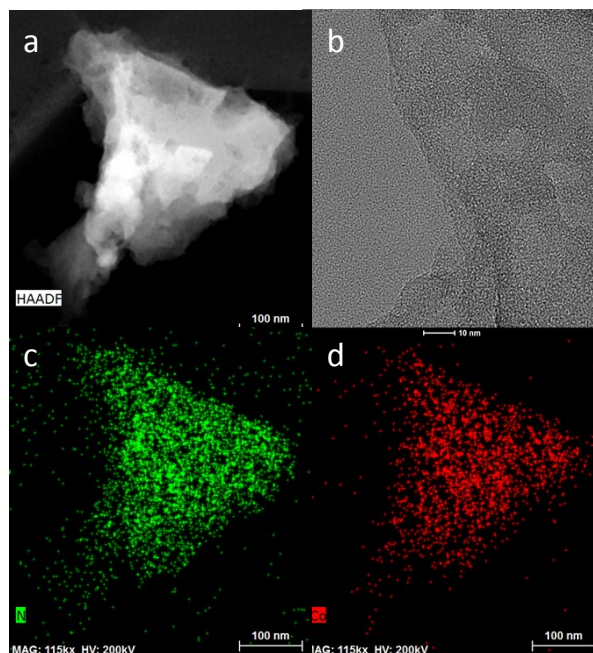

Figure S8 Representative TEM dark field (a) and bright field (b) image of Co-N-C catalyst after eight catalytic cycles and the corresponding EDX mapping image (c, d) of the catalyst.

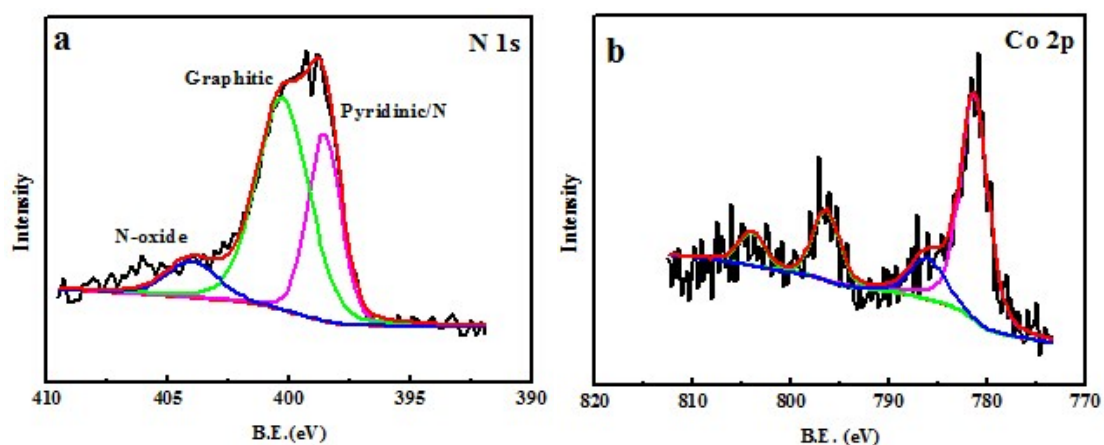

Figure S9 N 1s (a) and Co 2p (b) XPS spectrum of Co-N-C catalyst after eight catalytic cycles.

Table S6 XPS surface content of fresh and the recycled Co-N-C catalyst.

| Catalyst           | C (%) | O (%) | Co (%) | N (%) |
|--------------------|-------|-------|--------|-------|
| Co-N-C             | 50.2  | 26.7  | 4.5    | 9.9   |
| Recycled<br>Co-N-C | 80.5  | 9.7   | 1.0    | 8.5   |

## 6. Characterization of $\beta$ -O-4 lignin model compounds

### $^1\text{H}$ NMR spectrum of the substrates

$^1\text{H}$  NMR spectrum of the prepared substrates 2-(2-methoxyphenoxy)-1-phenylethanol (Fig. S10), 2-(2-methoxyphenoxy)-1-phenylethanone (Fig. S11), 2-phenoxy-1-phenylethanol (Fig. S12), 2-(2,6-dimethoxyphenoxy)-1-phenylethanol (Fig. S13), 1-(benzyloxy)-2-methoxybenzene (Fig. S14). Spectra were recorded on a Bruker DMX 400 instrument using a  $\text{CDCl}_3$  as solvent.

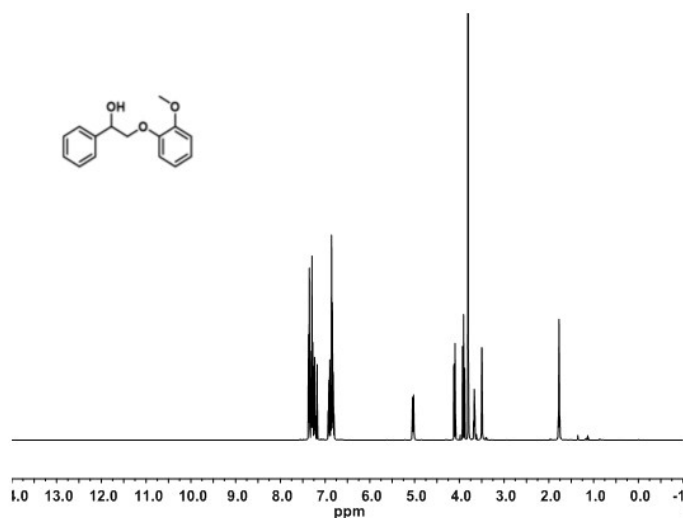

Figure S10  $^1\text{H}$  NMR spectrum of 2-(2-methoxyphenoxy)-1-phenylethanol.

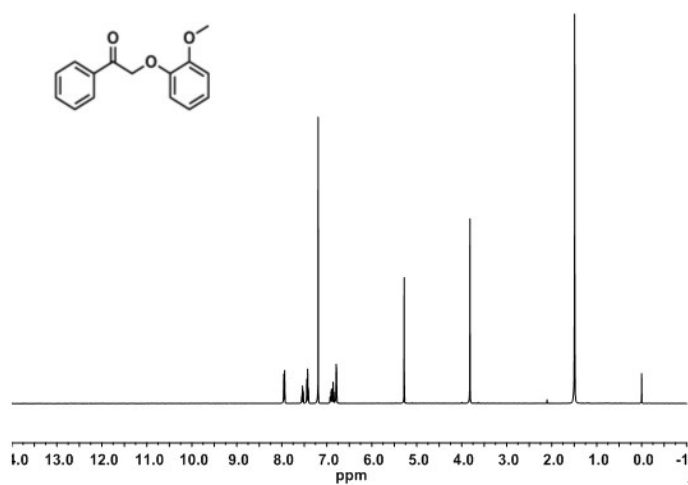

Figure S11 <sup>1</sup>H NMR spectrum of 2-(2-methoxyphenoxy)-1-phenylethanone.

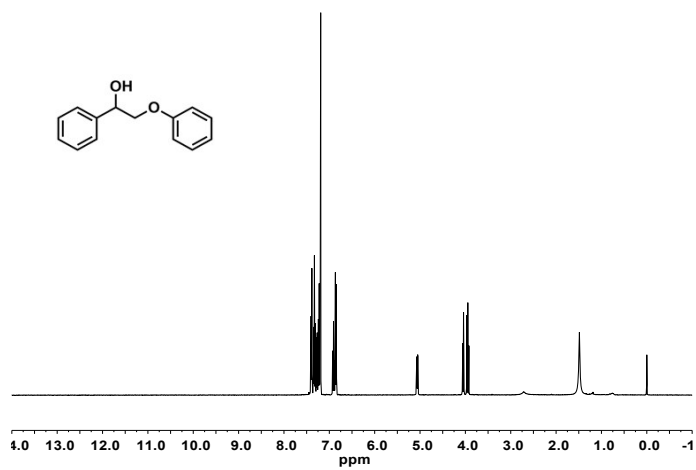

Figure S12 <sup>1</sup>H NMR spectrum of 2-phenoxy-1-phenylethanol.

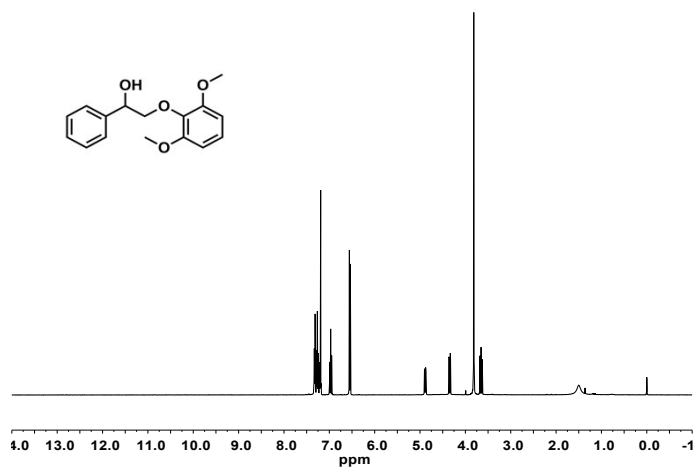

Figure S13 <sup>1</sup>H NMR spectrum of 2-(2,6-dimethoxyphenoxy)-1-phenylethanol.



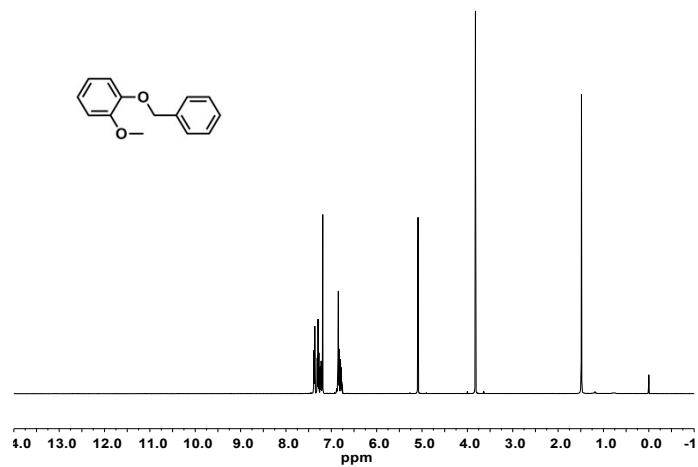

Figure S14  $^1\text{H}$  NMR spectrum of 1-(benzyloxy)-2-methoxybenzene.

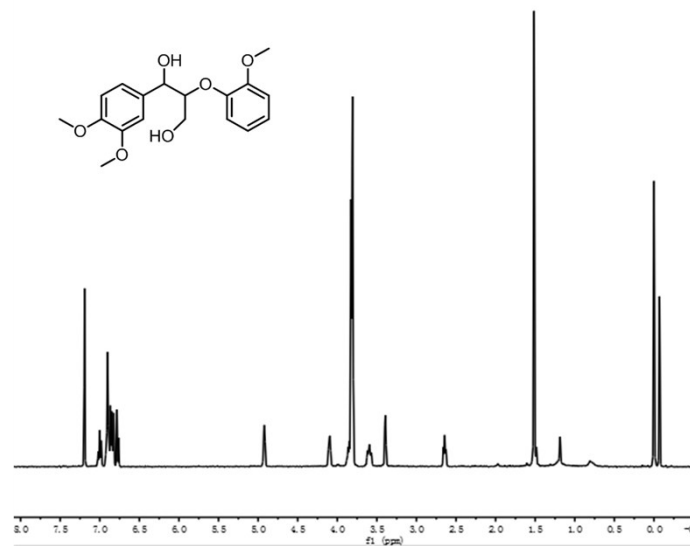

Figure S15  $^1\text{H}$  NMR spectrum of 1-(3,4-dimethoxyphenyl)-2-(2-methoxyphenoxy)-propane-1,2-diol (DMPD).

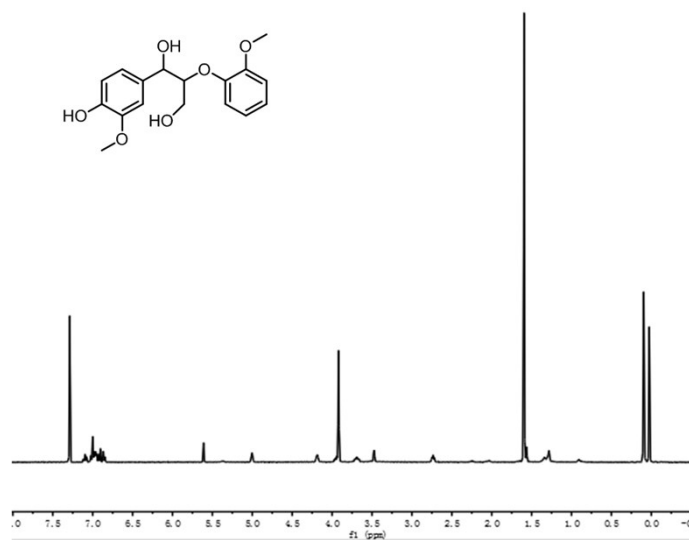

Figure S16  $^1\text{H}$  NMR spectrum of guaiacylglycerol-guaiacyl ether (GGE).

## 7. References

- [1] P. Yin, T. Yao, Y. Wu, L. Zheng, Y. Lin, W. Liu, H. Ju, J. Zhu, X. Hong, Z. Deng, G. Zhou, S. Wei, Y. Li, *Angew. Chem. Int. Ed.*, 2016, **55**, 10800-10805.
- [2] W. Huo, W. Li, M. Zhang, W. Fan, H. Chang, H. Jameel, *Catal. Lett.*, 2014, **144**, 1159-1163.
- [3] B. Zhang, C. Li, T. Dai, G. W. Huber, A. Wang, T. Zhang, *RSC Adv.*, 2015, **5**, 84967-84973.
- [4] C. Zhu, W. Ding, T. Shen, C. Tang, C. Sun, S. Xu, Y. Chen, J. Wu, H. Ying, *ChemSusChem*, 2015, **8**, 1768-1778.
- [5] W. Deng, H. Zhang, X. Wu, R. Li, Q. Zhang, Y. Wang, *Green Chem.*, 2015, **17**, 5009-5018.
- [6] M. Wang, J. Lu, X. Zhang, L. Li, H. Li, N. Luo, F. Wang, *ACS Catal.*, 2016, **6**, 6086-6090.
- [7] Y. Yang, H. Fan, Q. Meng, Z. Zhang, G. Yang, B. Han, *Chem. Commun.*, 2017, **53**, 8850-8853.
